# Supplementary material for: Pharmacological Inhibition of Spleen Tyrosine Kinase Suppressed Neuroinflammation and Cognitive Dysfunction in LPS-Induced Neurodegeneration Model
Source: MDPI journal article supplement (doi:10.3390/cells11111777), 2022-05-28
Supplement: s1 [file s1]

Supplementary Files

# Pharmacological Inhibition of Spleen Tyrosine Kinase Suppressed Neuroinflammation and Cognitive Dysfunction in LPS-induced Neurodegeneration Model

Min Woo Kim <sup>1,†</sup>, Kyonghwan Choe <sup>1,2,†</sup>, Jun Sung Park <sup>1,†</sup>, Hyeon Jin Lee <sup>1</sup>, Min Hwa Kang <sup>1</sup>, Riaz Ahmad <sup>1</sup> and Myeong Ok Kim <sup>1,3,\*</sup>

<sup>1</sup> Division of Life Sciences and Applied Life Science (BK 21 Four), College of Natural Science, Gyeongsang National University, Jinju 52828, Korea; mwkim0322@gnu.ac.kr (M.W.K.); k.choe@maastrichtuniversity.nl (K.C.); jsp@gnu.ac.kr (J.S.P.); lhj4912@gnu.ac.kr (H.J.L.); kmh1020@gnu.ac.kr (M.H.K.); riazk0499@gnu.ac.kr (R.A.)

<sup>2</sup> Department of Psychiatry and Neuropsychology, School for Mental Health and Neuroscience (MHeNs), Maastricht University, Maastricht 6229ER, The Netherlands

<sup>3</sup> Alz-Dementia Korea Co., Jinju 52828, Korea

\* Correspondence: mokim@gnu.ac.kr; Tel.: +82-55-772-1345

† These authors contributed equally to this paper.

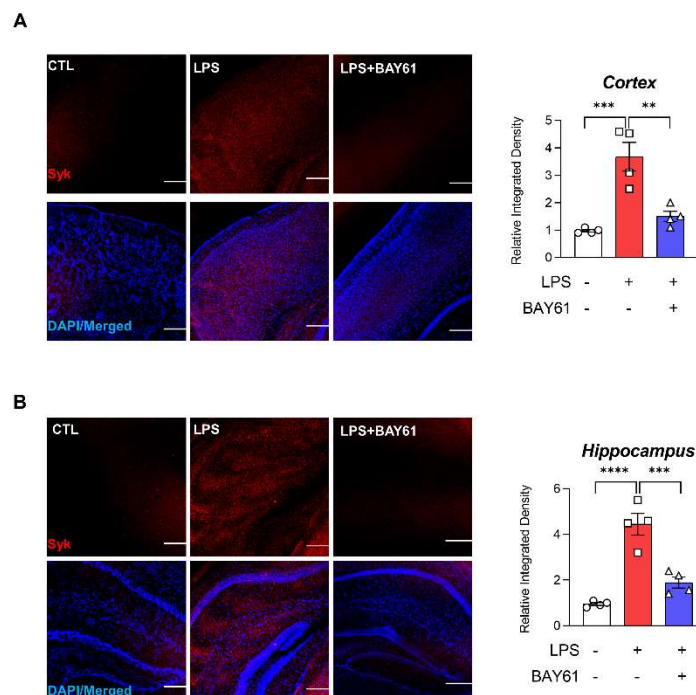

**Figure S1.** LPS-induced Syk expression is suppressed by BAY61-3606. Representative immunofluorescence images of Syk expression in (A) cortex and (B) hippocampus in LPS-induced mice with or without BAY61-3606. Scale bars, 100  $\mu$ m. Values indicate the mean  $\pm$  SEM, \*  $p < 0.05$ , \*\*  $p < 0.005$ , \*\*\*  $p < 0.0001$ , \*\*\*\*  $p < 0.00001$  compared with a group of interests and determined by one-way ANOVA followed by Tukey's multiple comparison test.

A

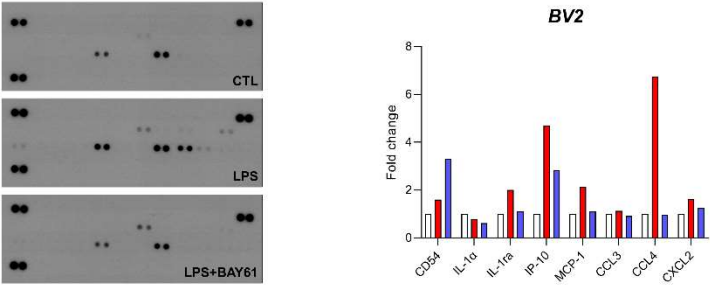

**Figure S2.** BAY61-3606 suppressed LPS-induced pro-inflammatory cytokines. (A) Dot blot of proteomic profiles for detecting inflammatory cytokines and quantification (Average of two independent experiments).

A

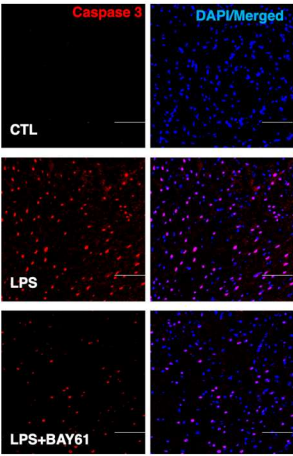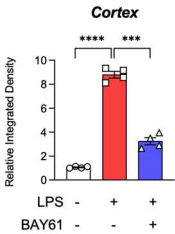

B

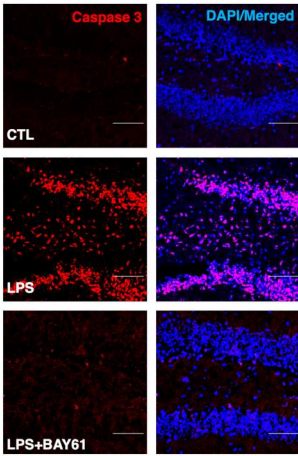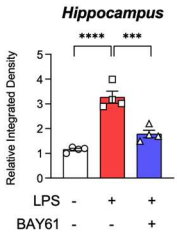

**Figure S3.** LPS-induced Caspase 3 is suppressed by BAY61-3606. Representative immunofluorescence images of Caspase 3 expression in (A) cortex and (B) hippocampus in LPS-induced mice with or without BAY61-3606. Scale bars, 25  $\mu$ m. Values indicate the mean  $\pm$  SEM, \*\*\*  $p < 0.0001$ , \*\*\*\*  $p < 0.00001$  compared with a group of interests and determined by one-way ANOVA followed by Tukey's multiple comparison test.

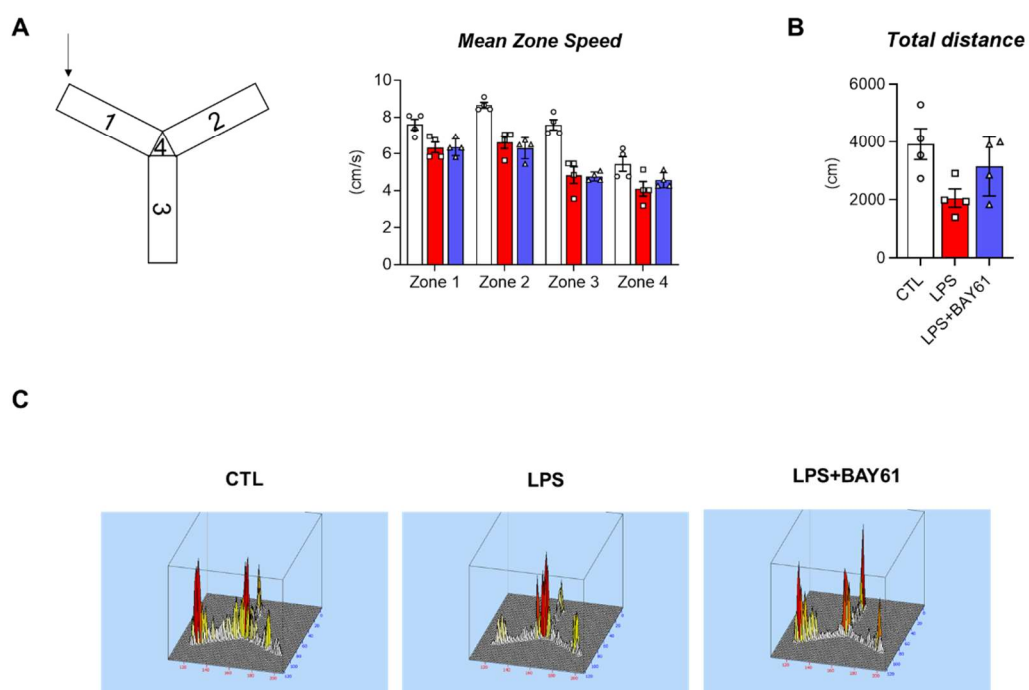

**Figure S4.** Effects of BAY61-3606 on LPS-induced spatial learning and memory impairments. **(A)** Definition of Y-maze zone (left) and mice speed in each zone. **(B)** Total distance in Y-maze zone. **(C)** Trajectory map of mice movements in Y-maze.
